# Supplementary material for: Lifestyle-Induced Microbial Gradients: An Indian Perspective
Source: Front Microbiol. 2019 Dec 17;10:2874. doi: 10.3389/fmicb.2019.02874 (PMC6928055; doi:10.3389/fmicb.2019.02874)
Supplement: Supplementary file 4 [file Table_3.xlsx]

## Sheet: Sheet1
Supplementary Table S3: Taxonomic assignments of core as well significantly abundant OTUs identified in the present study. Blastn pair-wise alignment was employed for deducing taxonomic affiliations of respective OTUs
Core OTUs
OTU_ID	Accession_ID	Species annotation using Blastn	Percent_Identity
OTU_2	NR_113411.1	Prevotella_copri_strain_JCM_13464_16S_ribosomal_RNA_gene,_partial_sequence	96.88
OTU_7	NR_028961.1	Faecalibacterium_prausnitzii_strain_ATCC_27768_16S_ribosomal_RNA_gene,_partial_sequence	98.56
OTU_101022	NR_113411.1	Prevotella_copri_strain_JCM_13464_16S_ribosomal_RNA_gene,_partial_sequence	97.83
OTU_106	NR_042007.1	Roseburia_inulinivorans_strain_A2-194_16S_ribosomal_RNA,_partial_sequence	100
OTU_1154	NR_113316.1	Collinsella_aerofaciens_strain_JCM_10188_16S_ribosomal_RNA_gene,_partial_sequence	98.87
OTU_125	NR_113316.1	Collinsella_aerofaciens_strain_JCM_10188_16S_ribosomal_RNA_gene,_partial_sequence	97.44
OTU_154	NR_104836.1	Lactobacillus_rogosae_strain_ATCC_27753_16S_ribosomal_RNA_gene,_partial_sequence	99.29
OTU_19	NR_040877.1	Prevotella_copri_strain_CB7_16S_ribosomal_RNA_gene,_partial_sequence	96.35
OTU_191	NR_028883.1	Dorea_longicatena_strain_111-35_16S_ribosomal_RNA_gene,_partial_sequence	99.76
OTU_200	NR_116747.1	Ruminococcus_faecis_strain_Eg2_16S_ribosomal_RNA_gene,_partial_sequence	100
OTU_30	NR_074634.1	[Eubacterium]_rectale_strain_ATCC_33656_16S_ribosomal_RNA,_partial_sequence	100
OTU_33	NR_113411.1	Prevotella_copri_strain_JCM_13464_16S_ribosomal_RNA_gene,_partial_sequence	99.09
OTU_456	NR_147396.1	Lachnoclostridium_pacaense_strain_Marseille-P3100_16S_ribosomal_RNA,_partial_sequence	95
OTU_457	NR_044731.2	Holdemanella_biformis_strain_DSM_3989_16S_ribosomal_RNA,_partial_sequence	96.88
OTU_46	NR_028961.1	Faecalibacterium_prausnitzii_strain_ATCC_27768_16S_ribosomal_RNA_gene,_partial_sequence	96.51
OTU_464	NR_104846.1	Gemmiger_formicilis_strain_X2-56_16S_ribosomal_RNA_gene,_partial_sequence	100
OTU_497	NR_118156.1	Oscillibacter_ruminantium_strain_GH1_16S_ribosomal_RNA_gene,_partial_sequence	92.74
OTU_64	NR_041666.1	Dialister_succinatiphilus_strain_YIT_11850_16S_ribosomal_RNA_gene,_partial_sequence	97.09
OTU_72572	NR_040877.1	Prevotella_copri_strain_CB7_16S_ribosomal_RNA_gene,_partial_sequence	96.52
OTU_73	NR_028961.1	Faecalibacterium_prausnitzii_strain_ATCC_27768_16S_ribosomal_RNA_gene,_partial_sequence	99.76
OTU_880	NR_074793.2	Oscillibacter_valericigenes_strain_Sjm18-20_16S_ribosomal_RNA,_complete_sequence	94.52
Differentiating OTUs
OTU_ID	Accession_ID	Species annotation using Blastn	Percent_Identity
OTU_2	NR_113411.1	Prevotella_copri_strain_JCM_13464_16S_ribosomal_RNA_gene,_partial_sequence	96.88
OTU_3	NR_040877.1	Prevotella_copri_strain_CB7_16S_ribosomal_RNA_gene,_partial_sequence	94.1
OTU_30	NR_074634.1	[Eubacterium]_rectale_strain_ATCC_33656_16S_ribosomal_RNA,_partial_sequence	100
OTU_33	NR_113411.1	Prevotella_copri_strain_JCM_13464_16S_ribosomal_RNA_gene,_partial_sequence	99.09
OTU_540650	NR_040877.1	Prevotella_copri_strain_CB7_16S_ribosomal_RNA_gene,_partial_sequence	96.23
OTU_64	NR_041666.1	Dialister_succinatiphilus_strain_YIT_11850_16S_ribosomal_RNA_gene,_partial_sequence	97.09
OTU_7	NR_028961.1	Faecalibacterium_prausnitzii_strain_ATCC_27768_16S_ribosomal_RNA_gene,_partial_sequence	98.56
OTU_73	NR_028961.1	Faecalibacterium_prausnitzii_strain_ATCC_27768_16S_ribosomal_RNA_gene,_partial_sequence	99.76
OTU_9	NR_026476.1	Succinivibrio_dextrinosolvens_strain_0554_16S_ribosomal_RNA_gene,_partial_sequence	97.62
OTU_13	NR_028961.1	Faecalibacterium_prausnitzii_strain_ATCC_27768_16S_ribosomal_RNA_gene,_partial_sequence	98.77
